# Supplementary material for: Energetic derivatives of 5-(5-amino-2H-1,2,3-triazol-4-yl)-1H-tetrazole
Source: Royal Society of Chemistry journal article supplement (doi:10.1039/c5dt03044g), 2015-01-01
Supplement: c5dt03044g1.pdf [file c5dt03044g1.pdf]

**Energetic Derivatives of  
5-(5-Amino-2*H*-1,2,3-triazol-4-yl)-1*H*-tetrazole**

**Supporting Information**

Dániel Izsák, Thomas M. Klapötke,\* and Carolin Pflüger

**Contents:**

- crystallographic data for **2** and **5**
- $^{15}\text{N}\{^1\text{H}\}$  NMR spectra of **6** and **7**

**Table S1:** Crystallographic data for **2** and **5**.

|                                            | <b>2</b>                                         | <b>5</b>                                     |
|--------------------------------------------|--------------------------------------------------|----------------------------------------------|
| Formula                                    | C <sub>10</sub> H <sub>11</sub> N <sub>5</sub> O | C <sub>3</sub> H <sub>4</sub> N <sub>8</sub> |
| <i>M</i> / g mol <sup>-1</sup>             | 217.23                                           | 152.14                                       |
| Color                                      | colorless                                        | colorless                                    |
| Habit                                      | block                                            | block                                        |
| Crystal size / mm                          | 0.267 × 0.127 × 0.117                            | 0.080 × 0.050 × 0.040                        |
| Crystal system                             | monoclinic                                       | monoclinic                                   |
| Space Group                                | <i>P</i> 2 <sub>1</sub> / <i>c</i> (14)          | <i>P</i> 2 <sub>1</sub> / <i>n</i> (14)      |
| <i>a</i> / Å                               | 11.731(4)                                        | 6.9019(4)                                    |
| <i>b</i> / Å                               | 7.423(2)                                         | 11.6423(7)                                   |
| <i>c</i> / Å                               | 11.188(4)                                        | 8.0685(4)                                    |
| $\alpha$ / °                               | 90                                               | 90                                           |
| $\beta$ / °                                | 93.655(3)                                        | 113.881(2)                                   |
| $\gamma$ / °                               | 90                                               | 90                                           |
| <i>V</i> / Å <sup>3</sup>                  | 972.3(5)                                         | 592.83(6)                                    |
| <i>Z</i>                                   | 4                                                | 4                                            |
| $\rho_{\text{calc.}}$ / g cm <sup>-3</sup> | 1.484                                            | 1.705                                        |
| <i>T</i> / K                               | 173(2)                                           | 100(2)                                       |
| <i>F</i> (000)                             | 456                                              | 312                                          |
| $\mu$ / mm <sup>-1</sup>                   | 0.104                                            | 0.131                                        |
| $\lambda_{\text{MoK}\alpha}$ / Å           | 0.71073                                          | 0.71073                                      |
| $\theta$ range / °                         | 4.14–26.37                                       | 3.269–26.367                                 |
| Dataset ( <i>h</i> ; <i>k</i> ; <i>l</i> ) | –14:14; –9:9; –12:13                             | –8:8; –14:14; –9:10                          |
| Collected reflections                      | 6884                                             | 6279                                         |
| Independent reflections                    | 1980                                             | 1218                                         |
| Observed reflections                       | 1738                                             | 1057                                         |
| <i>R</i> <sub>int.</sub>                   | 0.0235                                           | 0.0217                                       |
| Parameters                                 | 189                                              | 116                                          |
| Restraints                                 | 0                                                | 0                                            |
| <i>R</i> <sub>1</sub> (obs.)               | 0.0318                                           | 0.0323                                       |
| <i>wR</i> <sub>2</sub> (all data)          | 0.0802                                           | 0.0903                                       |
| <i>S</i>                                   | 1.063                                            | 1.085                                        |
| Res. dens. / e Å <sup>-3</sup>             | –0.203:0.240                                     | –0.191:0.348                                 |
| Solution                                   | SIR97                                            | SIR97                                        |
| Refinement                                 | SHELXL-97                                        | SHELXL-2013                                  |
| Absorption correction                      | multi-scan                                       | multi-scan                                   |
| CCDC                                       | 1406925                                          | 1413469                                      |

## NMR Spectroscopy

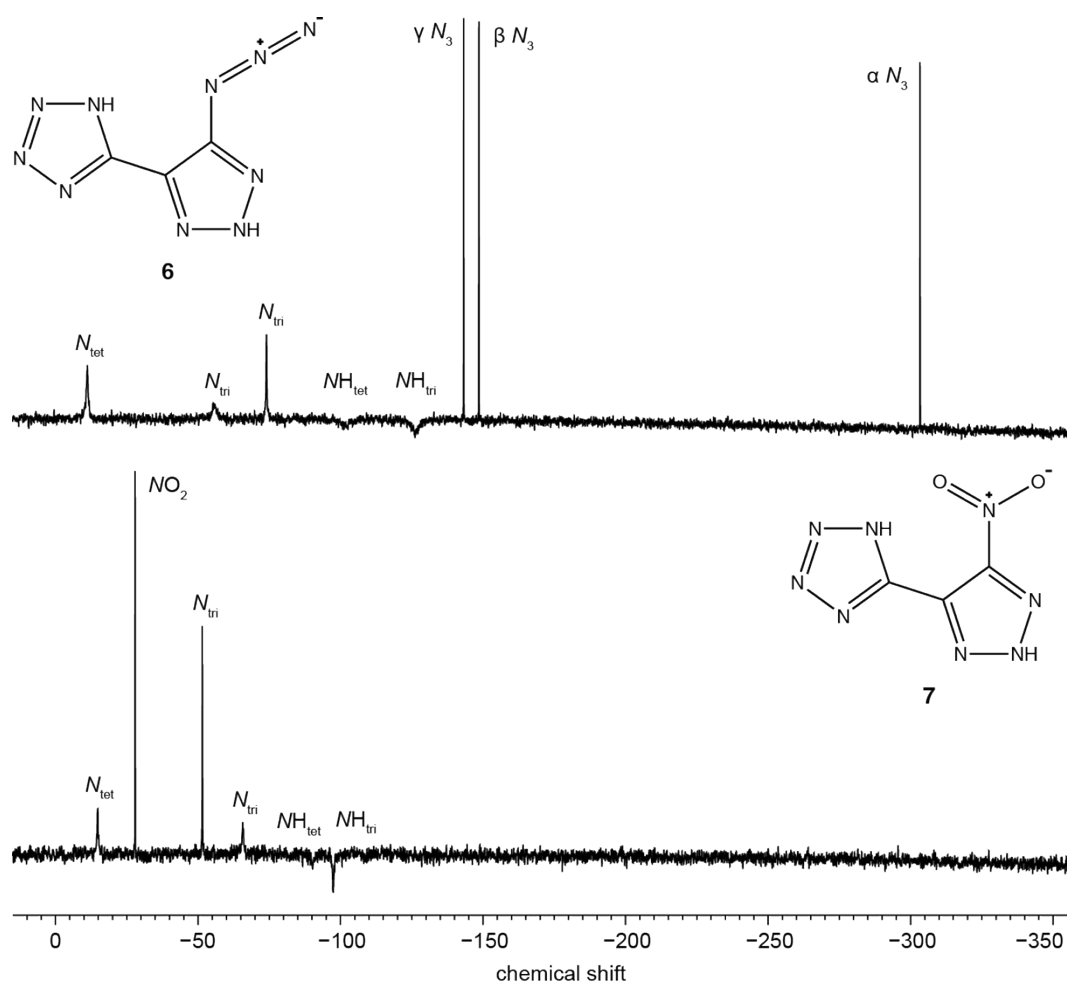

**Figure S1:**  $^{15}\text{N}\{^1\text{H}\}$  NMR spectra of 5-(5-azido-2H-1,2,3-triazol-4-yl)-1H-tetrazole (**6**) and 5-(5-nitro-2H-1,2,3-triazol-4-yl)-1H-tetrazole (**7**) in  $\text{DMSO-}d_6$  at room temperature.
